# Supplementary material for: Essential role for the TRF2 telomere protein in adult skin homeostasis
Source: PubMed Central journal article supplement (PMC4326939; doi:10.1111/acel.12221), 2014-04-14

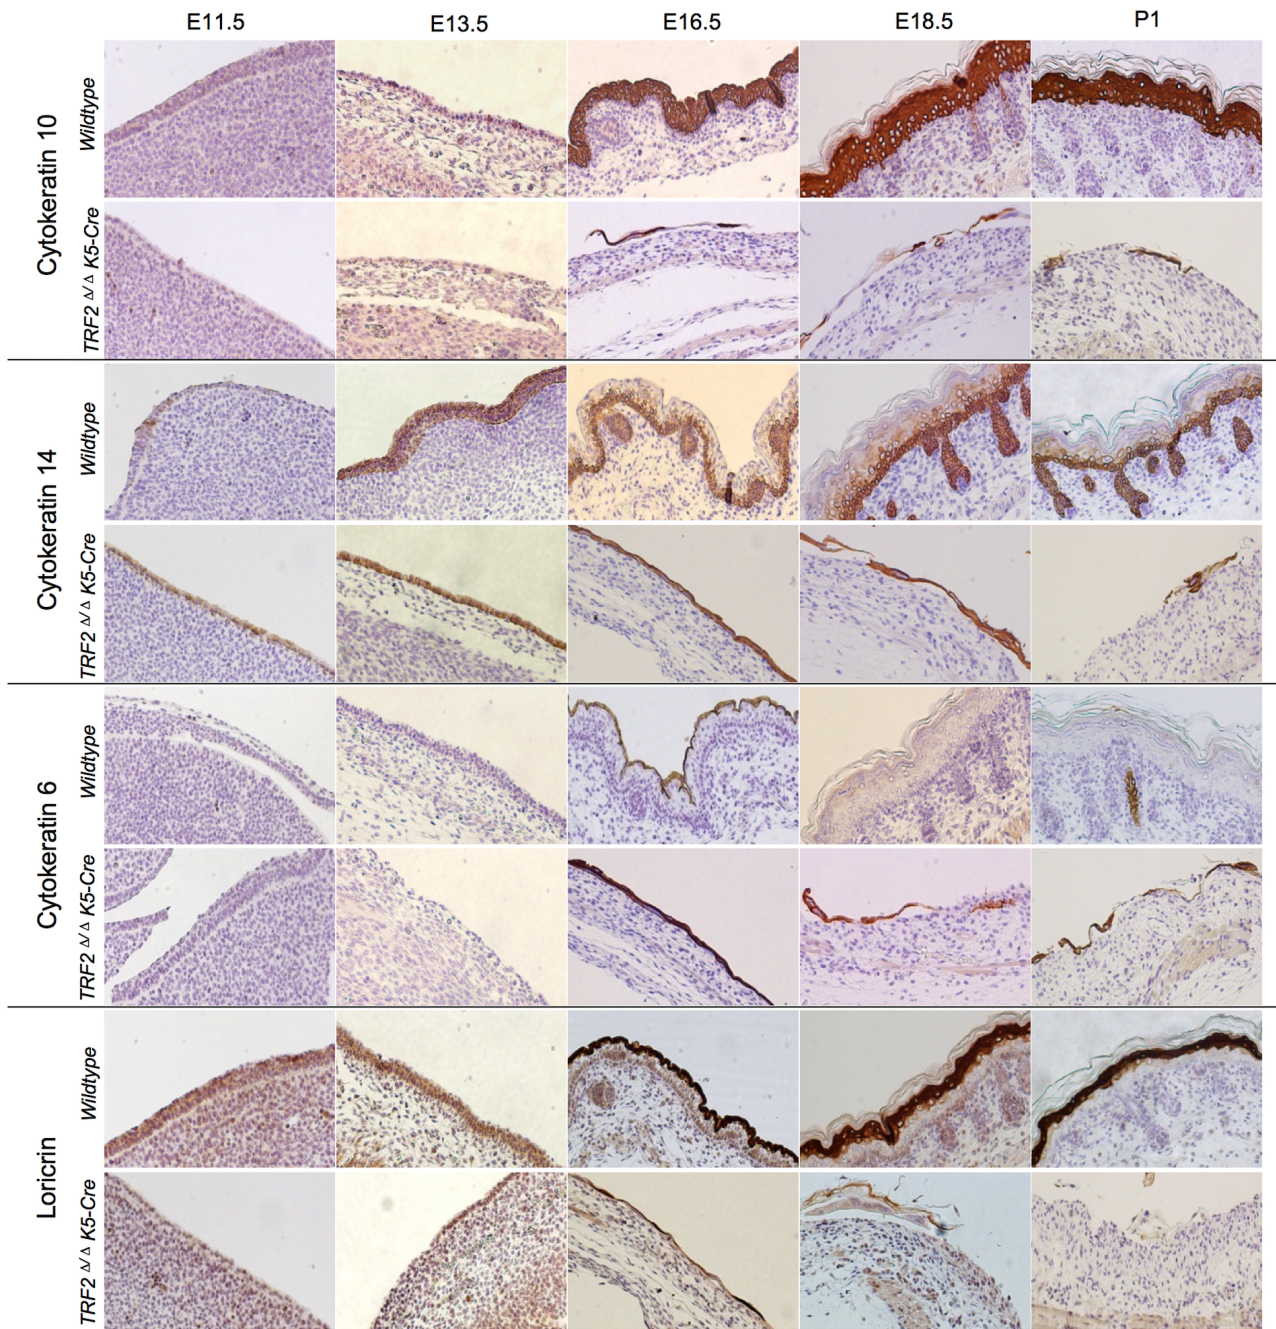

Supplementary Figure 2

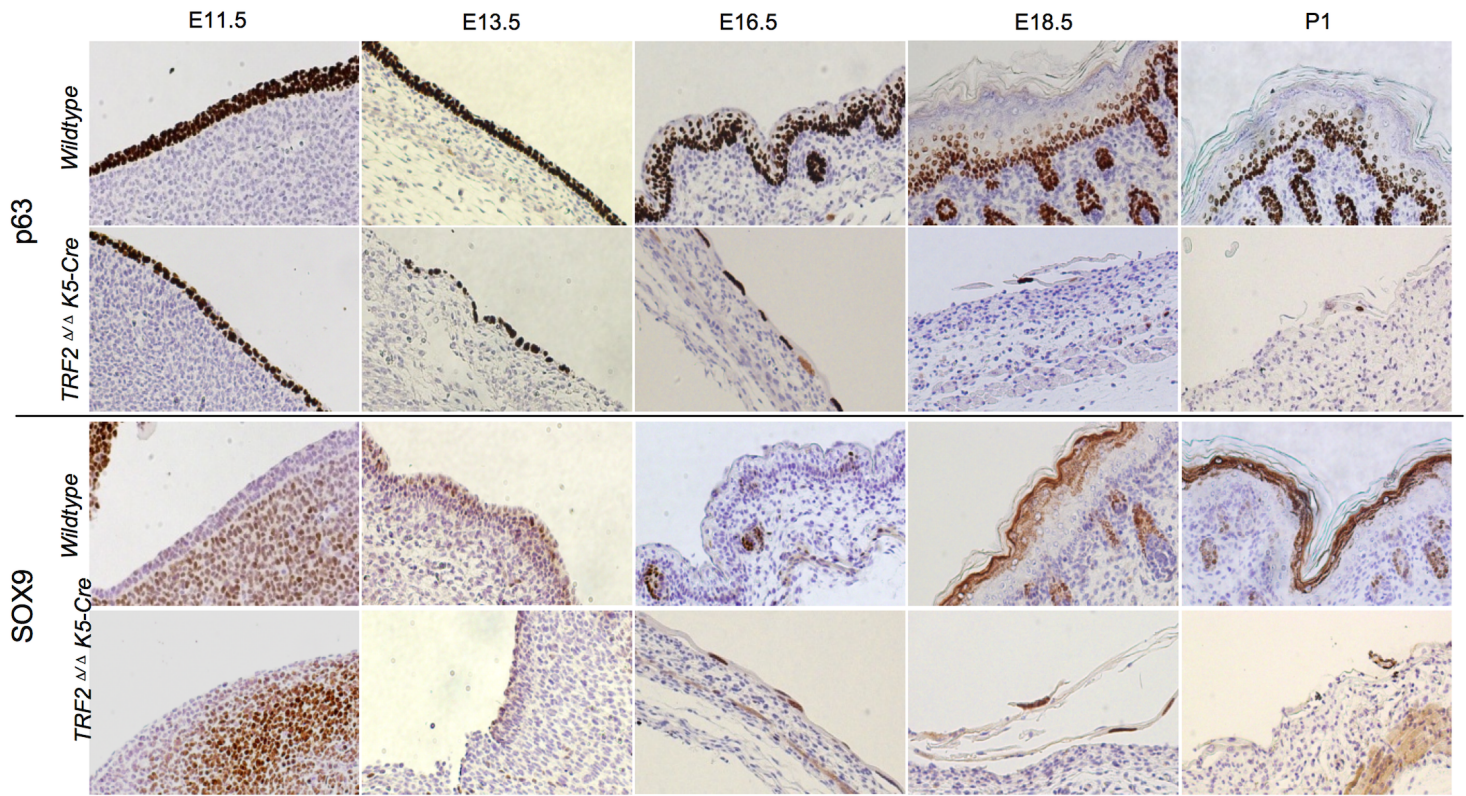

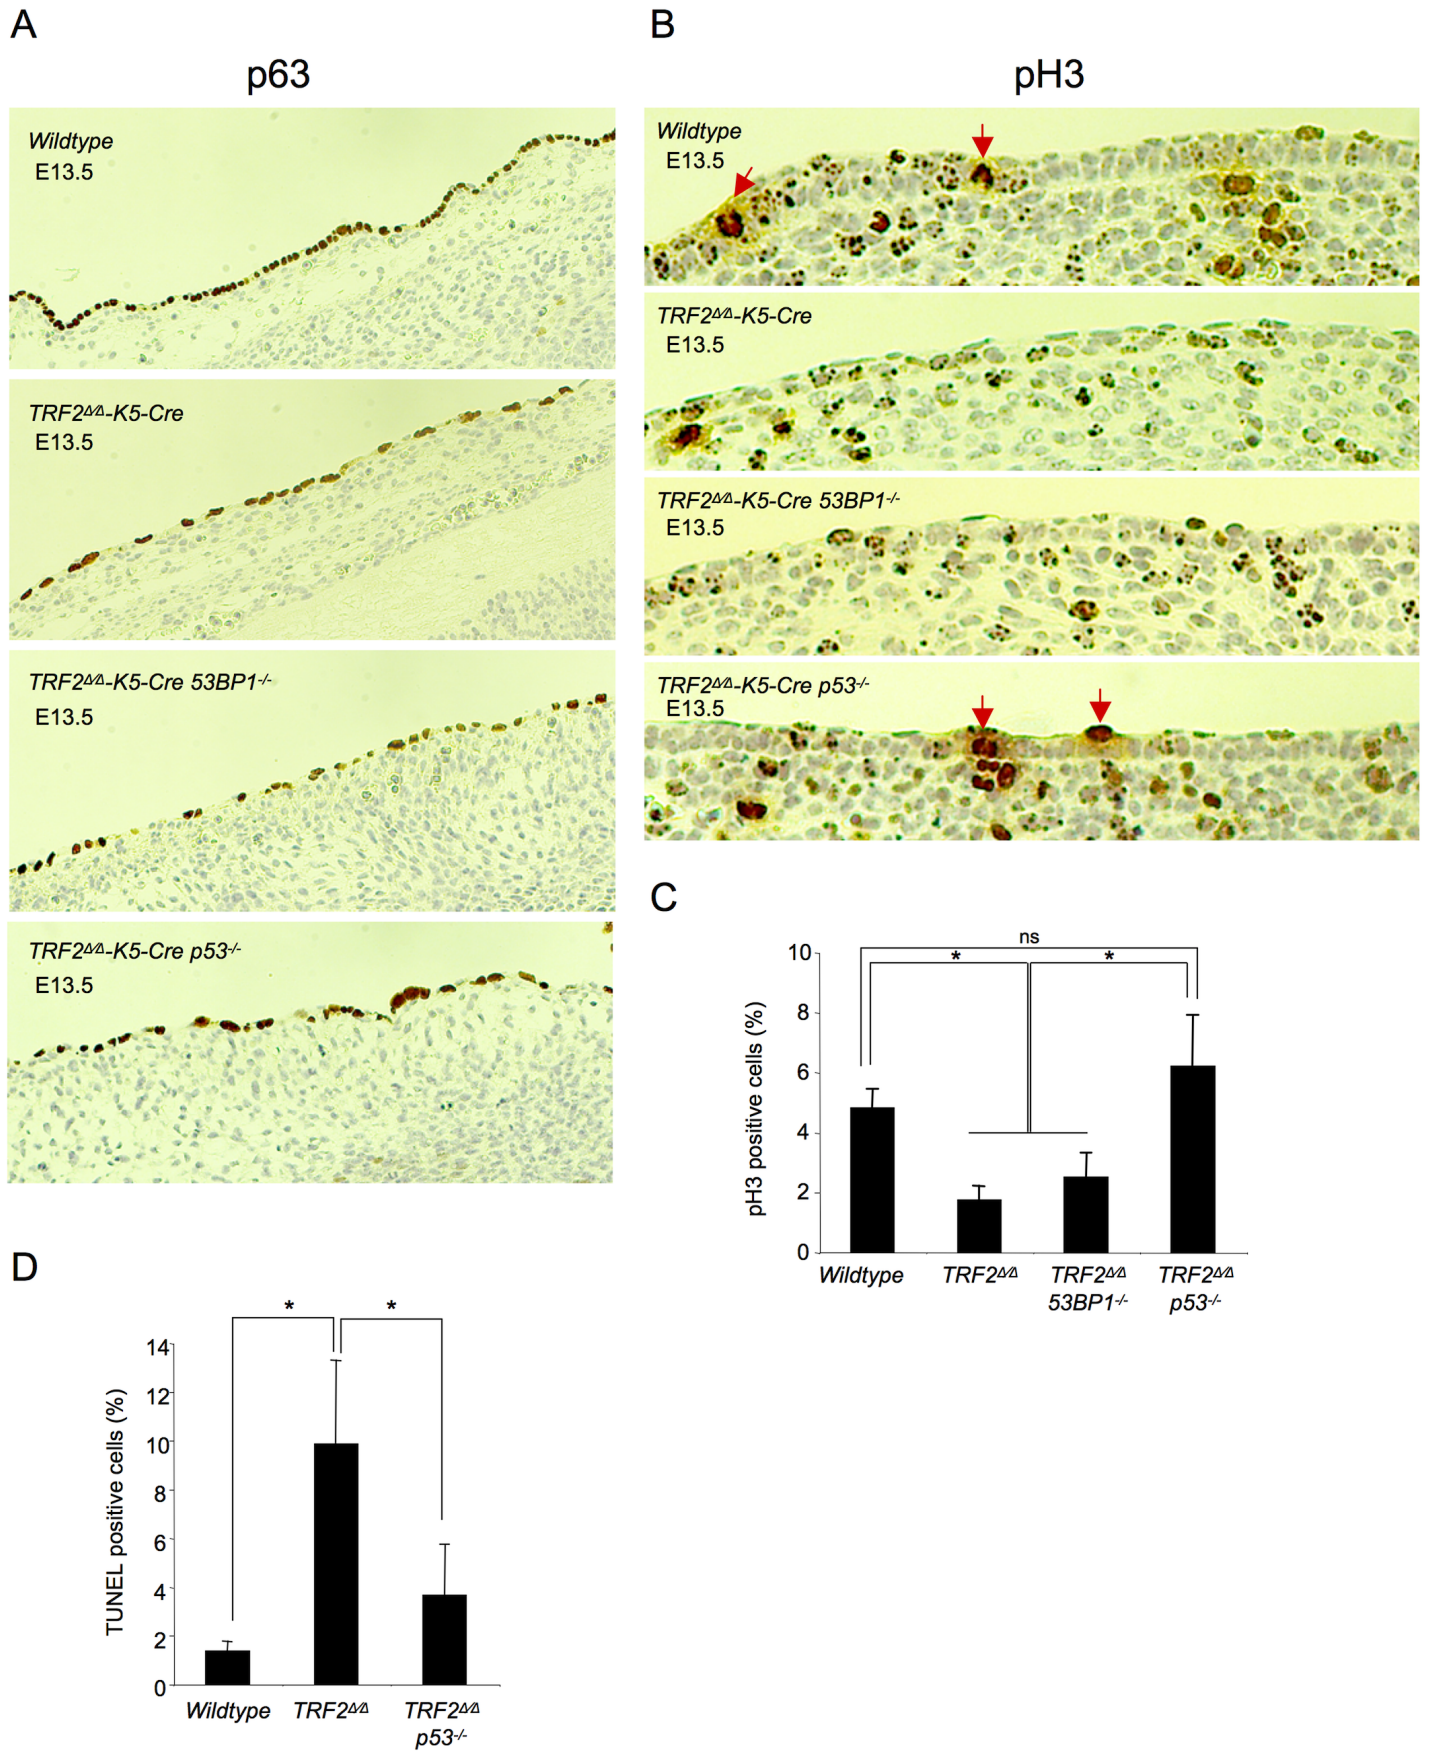

A

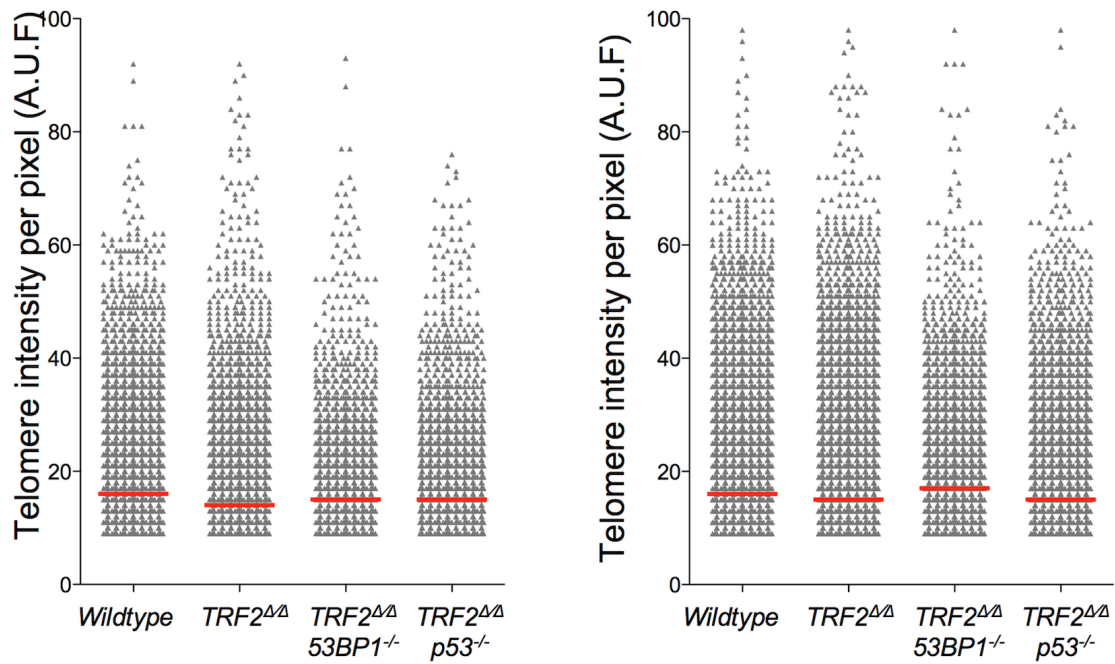

B

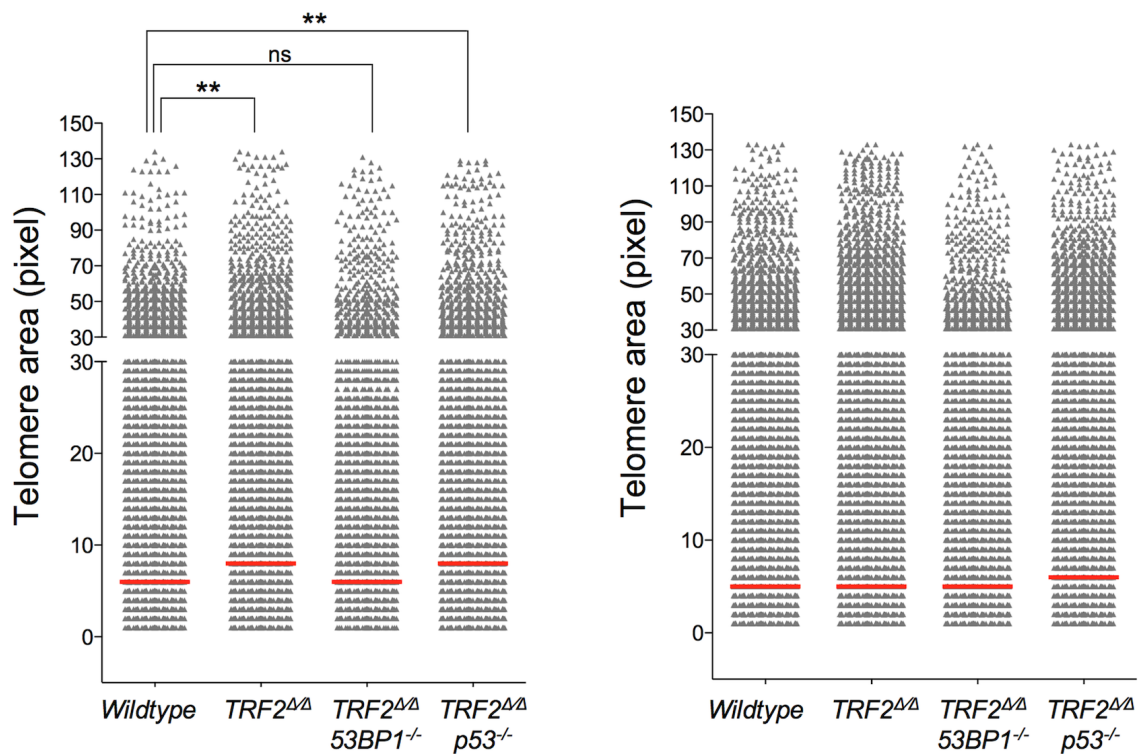

Supplement: acel0013-0656-sd1.pdf [file acel0013-0656-sd1.pdf]
